# Supplementary material for: A set of defined oncogenic mutation alleles seems to better predict the response to cetuximab in CRC patient-derived xenograft than KRAS 12/13 mutations
Source: PubMed Central journal article supplement (PMC4747370; doi:10.18632/oncotarget.5886), 2015-10-26
Supplement: oncotarget-06-40815-s001.pdf [file oncotarget-06-40815-s001.pdf]

## SUPPLEMENTARY TABLE AND FIGURES

Supplementary Table S1: Pathology diagnosis and EGFR expressions of PDXs

| ID     | Patient diagnosis                                                                                                                                                                                                                                                                 | PDX diagnosis                                                                         | EGFR RNAseq | EGFR IHC score |
|--------|-----------------------------------------------------------------------------------------------------------------------------------------------------------------------------------------------------------------------------------------------------------------------------------|---------------------------------------------------------------------------------------|-------------|----------------|
| CR0004 | ADC of colon, protruded type, moderately differentiated, invaded through intestinal wall to peripheral adipose tissue. Regional LN: paraintestinal LN (1/7). IHC results: HER-1(-), HER-2(-), p53(+ 50 ~ 75%), p170(-), Ki-67(+ 25 ~ 50%), VEGF(+++), Top-IIα(+<25%), p16(+<25%). | Moderately differentiated tubular ADC                                                 | 2.56        | 2.5            |
| CR0010 | ADC of descending colon, carcinoma <i>in situ</i> , ulcerative type, well-moderately differentiated, tumor mass: 6 cm × 4.5 cm × 3.5 cm.                                                                                                                                          | Moderately differentiated tubular ADC                                                 | 1.69        | 3.0            |
| CR0012 | ADC of rectum, ulcerative type, carcinoma <i>in situ</i> , moderately differentiated, tumor mass: 6 cm × 5.5 cm × 1.5 cm.                                                                                                                                                         | Moderately differentiated tubular ADC                                                 | 2.27        | 2.5            |
| CR0029 | Carcinoid, protruded type.                                                                                                                                                                                                                                                        | Poorly differentiated ADC                                                             | 2.65        | 2.5            |
| CR0047 | NA                                                                                                                                                                                                                                                                                | Moderately to poorly differentiated ADC                                               | 1.72        | 2.5            |
| CR0146 | ADC with mucinous carcinoma, moderately-poorly differentiated, ulcerative type, invaded serosa, tumor mass: 5 cm × 4 cm × 1 cm. No malignant cells adjacent to both stumps. Regional LN: mesenteric LN (0/5).                                                                     | Moderately differentiated tubular ADC                                                 | 2.05        | 2.0            |
| CR0150 | ADC of cecum, moderately-poorly differentiated, ulcerative type, invaded serosa, tumor mass: 5 cm × 5 cm × 1 cm. No malignant cells adjacent to both stumps. Regional LN: mesenteric LN (3/6).                                                                                    | Moderately to poorly differentiated ADC, 64-P4: Moderately differentiated tubular ADC | 1.45        | 2.5            |
| CR0170 | ADC of rectum, ulcerative type, moderately-poorly differentiated, invaded deep muscular layer, tumor mass: 4 cm × 3 cm × 1 cm. No malignant cells adjacent to both stumps. Regional LN: mesenteric LN (0/2).                                                                      | Moderately to poorly differentiated ADC                                               | 2.03        | 2.0            |
| CR0193 | ADC of colon, moderately differentiated, ulcerative type, invaded serosa, tumor mass: 6.5 cm × 4.5 cm × 1.5 cm. No malignant cells adjacent to both stumps. Regional LN: mesenteric LN (0/9).                                                                                     | Moderately differentiated ADC                                                         | 2.41        | 1.5            |
| CR0196 | ADC of the rectum, moderately differentiated, ulcerative type, invaded serosa, tumor mass: 3.5 cm × 3 cm × 0.8 cm. No malignant cells adjacent to both stumps. Regional LN: mesenteric LN (8/10).                                                                                 | Moderately differentiated ADC                                                         | 2.25        | 2.5            |

(Continued)

| ID     | Patient diagnosis                                                                                                                                                                                                                                                                                                                                                                                                                                                                                                                                                    | PDX diagnosis                                                                                                         | EGFR RNAseq | EGFR IHC score |
|--------|----------------------------------------------------------------------------------------------------------------------------------------------------------------------------------------------------------------------------------------------------------------------------------------------------------------------------------------------------------------------------------------------------------------------------------------------------------------------------------------------------------------------------------------------------------------------|-----------------------------------------------------------------------------------------------------------------------|-------------|----------------|
| CR0205 | 1. ADC of transverse colon, moderately-poorly differentiated, infiltrative type, invaded serosa, tumor mass: 8 cm × 7 cm × 1.5 cm. No malignant cells adjacent to both stumps. Regional LN: mesenteric LN (1/7).<br>2. ADC of duodenal papilla, moderately-poorly differentiated, invaded submucosa, tumor mass: 2.4 cm × 1.2 cm × 1cm. No malignant cells adjacent to both stumps and pancreatic stump. Regional LN: parahepatic artery LN (0/2), LN surround common hepatic duct (0/3), greater curvature LN (0/2), parapyloric LN (0/8), peripancreatic LN (0/1). | Moderately to poorly differentiated ADC                                                                               | 2.76        | 2.0            |
| CR0231 | NA                                                                                                                                                                                                                                                                                                                                                                                                                                                                                                                                                                   | Moderately differentiated ADC with part of mucinous ADC                                                               | 1.66        | 2.0            |
| CR0245 | ADC of rectum, ulcerative type, moderately differentiated, invade muscular layer to rectal serosa, tumor mass: 5 cm × 5 cm × 2 cm. No malignant cells adjacent to superior and inferior stump. Mesenteric LN (0/7).                                                                                                                                                                                                                                                                                                                                                  | Mucinous ADC                                                                                                          | 2.07        | 2.5            |
| CR0455 | ADC of colon, poorly differentiated.                                                                                                                                                                                                                                                                                                                                                                                                                                                                                                                                 | Poorly differentiated ADC                                                                                             | 1.66        | 2.5            |
| CR0560 | NA                                                                                                                                                                                                                                                                                                                                                                                                                                                                                                                                                                   | Moderately to poorly differentiated ADC                                                                               | 1.87        | 2.5            |
| CR0588 | NA                                                                                                                                                                                                                                                                                                                                                                                                                                                                                                                                                                   | Poorly differentiated squamous cell carcinoma                                                                         | 1.51        | 1.5            |
| CR1245 | ADC of right lung, moderately differentiated (mixed type, include acinic cell ADC and mucinous ADC).                                                                                                                                                                                                                                                                                                                                                                                                                                                                 | ADC                                                                                                                   | 1.79        |                |
| CR1519 | NA                                                                                                                                                                                                                                                                                                                                                                                                                                                                                                                                                                   | Poorly differentiated ADC                                                                                             | 1.72        | 1.5            |
| CR1530 | NA                                                                                                                                                                                                                                                                                                                                                                                                                                                                                                                                                                   | Moderately differentiated ADC                                                                                         | 1.74        | 3.0            |
| CR1554 | ADC of rectum, ulcerative type, moderately differentiated, invade muscular layer to rectal serosa, tumor mass: 5 cm × 5 cm × 2 cm. No malignant cells adjacent to superior and inferior stump. Regional LN: mesenteric LN (0/7).                                                                                                                                                                                                                                                                                                                                     | Moderately to poorly differentiated ADC with part of normal intestinal mucosa<br>56-P5: Moderately differentiated ADC | 1.90        | 2.0            |
| CR1574 | NA                                                                                                                                                                                                                                                                                                                                                                                                                                                                                                                                                                   | Mucinous ADC                                                                                                          | 2.72        | 1.0            |
| CR1744 | Carcinoma of the gingiva. IHC results: CK(+), Vim(+), P63(+), SMA(+), CD5/6(focus +), CD10(+)                                                                                                                                                                                                                                                                                                                                                                                                                                                                        | Moderately differentiated ADC<br>60-P5: Mucinous ADC                                                                  | 2.23        | 1.5            |

(Continued)

| ID     | Patient diagnosis                                                                                                                                                                                                                                                                                                                                                                                                                                             | PDX diagnosis                        | EGFR RNAseq | EGFR IHC score |
|--------|---------------------------------------------------------------------------------------------------------------------------------------------------------------------------------------------------------------------------------------------------------------------------------------------------------------------------------------------------------------------------------------------------------------------------------------------------------------|--------------------------------------|-------------|----------------|
| CR1795 | ADC, ulcerative type, moderately-poorly differentiated, invade through intestinal wall to adipose tissue. No malignant cells adjacent to both stumps. Regional LN: paraintestinal LN (0/27). IHC results: CK7(-), CK20(+), EGFR(++), P53(+), Ki-67(80%+), Villin(+++), CerbB-2(+), OCT3/4(-).                                                                                                                                                                 | Poorly differentiated ADC            | 2.76        | ND             |
| CR2110 | ADC of sigmoid colon, moderately-poorly differentiated, ulcerative type, tumor cell invade serosa and adhere small intestine, tumor mass: 6 cm × 4 cm. No malignant cells adjacent to superior and inferior stump. Regional LN: pericolic LN (0/16), LN around small intestine (0/4). IHC results: CD44(+), Cmet(+), COX2(+), EGFR(-), HER2(1+), Ki-67(<25%), MLH1(+50-75%), MMP7(+), MSH2(>75%), MSH6(<25%), P170(+), P27(+25-50%), P53(>75%), TOPOII(<25%). | Moderately-poorly differentiated ADC | 2.35        | 2.5            |
| CR2226 | Mucinous ADC of colon, protruded type, with part of moderately differentiated ADC, tumor mass: 6.5 × 3.5 cm. Malignant cells invade peripheral adipose tissue. Regional LN: paraintestinal LN (3/47), LN of ligamentum hepatoduodenale (0/1), LN of porta hepatis (0/5). IHC results: CD44(+), cMet(-), COX2(+), EGFR(-), HER2(1+), Ki67(+25-50%), MLH1(+50 ~ 75%), MMP7(weak +), MSH2(<25%), MSH6(+50 ~ 75%), P170(+), P27(<25%), P53(-), TOPOII(-).         | Mucinous ADC                         | 1.80        | ND             |
| CR2502 | ADC of colon, protruded type, poorly differentiated, invaded peripheral adipose tissue. No malignant cells adjacent to both stumps. Regional LN: paraintestinal LN (5/17). IHC results: Syn(-), CHgA(-), NSE(-), CK7(-), CK20(++), Villin(+), CA199(++), CEA(++), P53(+), Ki67(80%+).                                                                                                                                                                         | Poorly differentiated ADC            | 3.07        | ND             |
| CR2520 | ADC of colon, protruded ulcerative type, moderately differentiated, invaded through intestinal wall. No malignant cells adjacent to both stumps. Regional LN: paraintestinal LN (0/26). IHC results: CD44(+), cMet(+), COX2(+), EGFR(+), HER2(1+), Ki-67(>75%), MLH1(-), MMP7(+), MSH2(+50-75%), MSH6(>75%), P170(+), P27(<25%), P53(<25%), TOPOII(<25%).                                                                                                     | Moderately differentiated ADC        | 2.17        | 2.0            |

Note: ADC: Adenocarcinoma

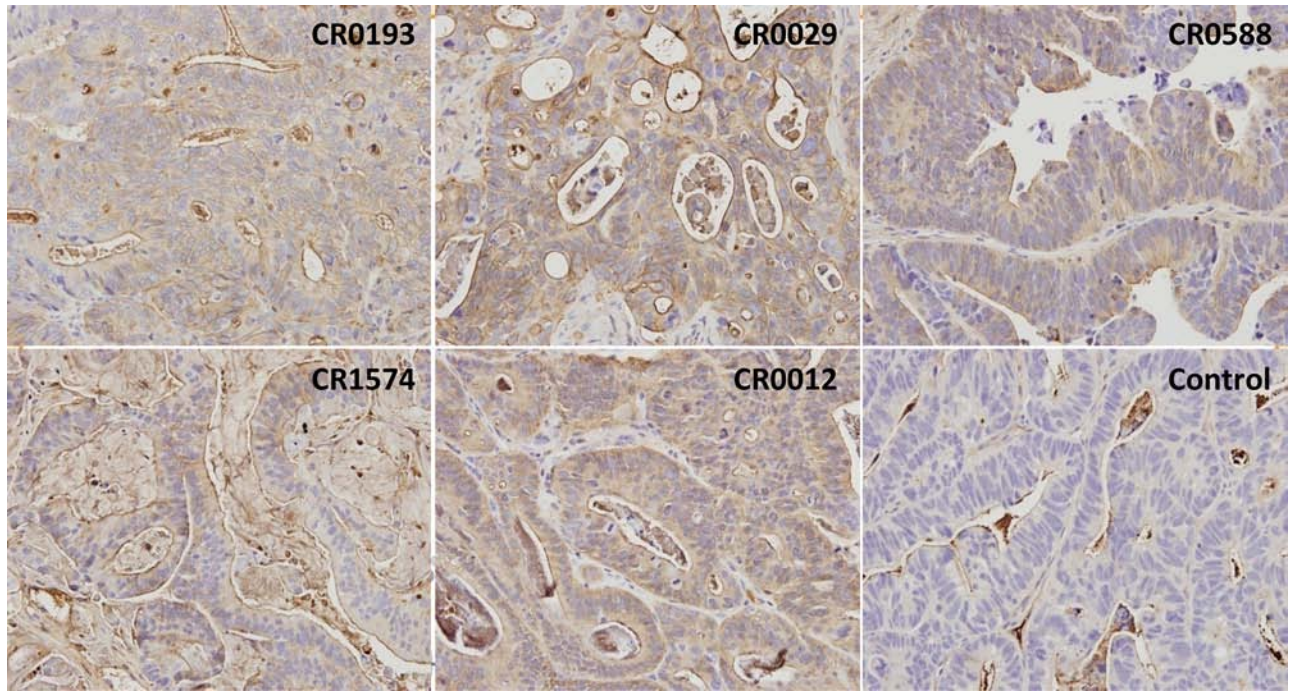

Supplementary Figure S1: EGFR-immunochemistry staining of CRC-PDX.

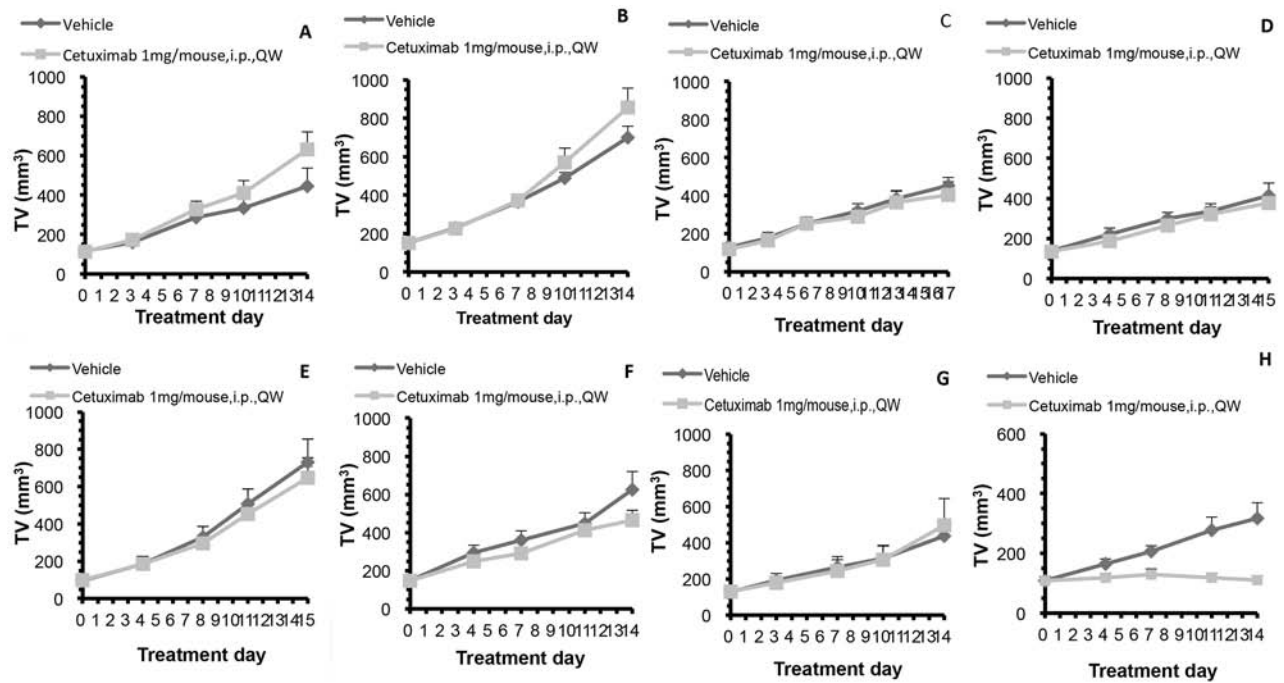

**Supplementary Figure S2: Anti-tumor activity of cetuximab in 8 CRC-PDXs.** Dark line: average tumor size (in 5 animals) for vehicle group (PBS qwX2 IP -- weekly for 2 weeks). Light line: average tumor size in treated group (5 mice), 1mg cetuximab qwX2 IP. **A.** CR0010: a non-responder with KRAS A146T mutation; **B.** CR1744: a non-responder with AKT1 L52R mutation; **C.** CR029: a non-responder with BRAF V600E mutation; **D.** CR1574 a non-responder with NRAS Q61R mutation. **E.** CR0455: a non-responder with KRAS G12D mutation; **F.** CR1519: a non-responder with KRAS Q61H mutation. **G.** a non-responder with PI3K E545G mutation. **H.** a responder with KRAS G13D mutation.
